# Supplementary material
Source: Springer Nature journal article supplement (https://www.springerprofessional.de/resource/supplementary/13688_2016_97_MOESM1_ESM.pdf/11984392)
Supplement: MOESM1 [file 11984392]

## SUPPLEMENTARY MATERIAL (SM)

### Absence makes the heart grow fonder: social compensation when failure to interact risks weakening a relationship

Kunal Bhattacharya,<sup>1,\*</sup> Asim Ghosh,<sup>1</sup> Daniel Monsivais,<sup>1</sup> Robin Dunbar,<sup>2,1</sup> and Kimmo Kaski<sup>1,2</sup>

<sup>1</sup>*Department of Computer Science, Aalto University School of Science,  
P.O. Box 15400, FI-00076 AALTO, Finland*

<sup>2</sup>*Department of Experimental Psychology, University of Oxford,  
South Parks Rd, Oxford, OX1 3UD, United Kingdom*

---

\* Corresponding author; kunal.bhattacharya@aalto.fi

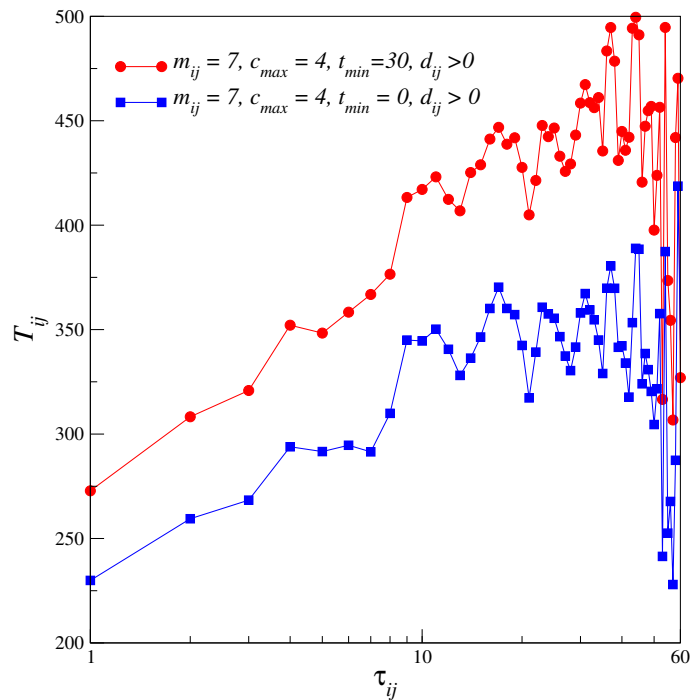

FIG. S1. **Linear binning of data for different thresholds ( $t_{min}$ ).** Duration of succeeding call ( $T_{ij}$ ) as a function of the gap ( $\tau_{ij}$ ) for pairs belonging to the set  $\mathcal{S}$  with the individuals aged between 25 and 45. Two different thresholds are used for the total aggregated duration in the 7 month period –  $t_{min} = 30$  minutes (red circles) and  $t_{min} = 0$  (no threshold) (blue squares). Linear binning is used for this plot unlike the log-binning used in the main text for reducing the fluctuation. The curves show a periodic drop in the call duration on multiples in 7 days. This behaviour is related to the presence of peaks in the distribution of the gaps ( $\tau_{ij}$ ). As such larger number of calls on the days at ‘weekends’ result in a drop in the average duration of a call on those days. The equation we have used for regression primarily takes into account the dependence  $T_{ij} \propto \log \tau_{ij}$ . We have not taken into account the periodicity present in the data.

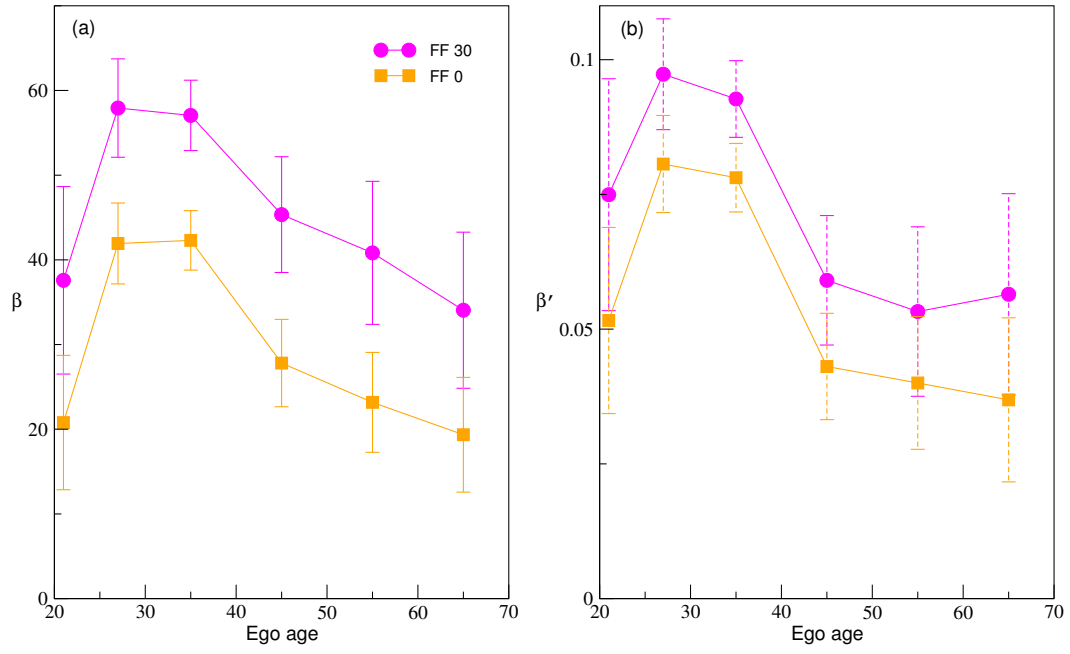

FIG. S2. **Values of  $\beta$  and  $\beta'$  for different thresholds ( $t_{min}$ ).** Comparison of the slopes of the regression fit (main text),  $\beta$  (a) and  $\beta'$  (b), for values of  $t_{min}$  equal to 30 minutes (circles) and zero (implying no threshold) (squares). For clarity only the values corresponding to female-female (FF) pairs chosen from set  $\mathcal{S}$  are shown. The values of  $\beta'$  show that even without a finite threshold on the calling duration, the values are different from zero.

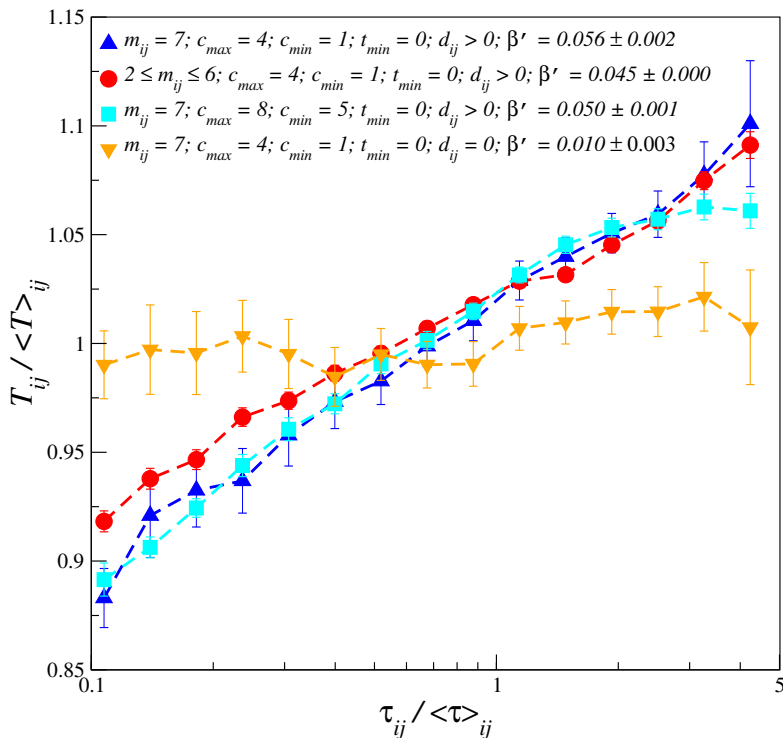

FIG. S3. **Effect of using different filtering parameters.** The figure illustrates the dependence of the scaled durations,  $T_{ij}/\langle T \rangle_{ij}$  on scaled gaps  $\tau_{ij}/\langle \tau \rangle_{ij}$  when the pairs are chosen using one or more conditions ( $m_{ij}$ ,  $c_{max}$ ,  $t_{min}$  and  $d_{ij}$ ) which are different from those that are used to construct  $\mathcal{S}$ . (We use an additional parameter  $c_{min}$  which denotes the minimum number of calls between a pair in a any month. For  $\mathcal{S}$ , at least one call every month ensures  $c_{min} = 1$ ). The pairs are sampled irrespective of the age and gender of the individuals. The curve with blue up-triangles with no lower limit is set on the aggregated call duration in the 7 month period ( $t_{min} = 0$ , rest of the parameters being the same as in  $\mathcal{S}$ ). The curve with red circles shows the behaviour when the condition  $m_{ij} = 7$  is relaxed. The pairs chosen are those that participate in calls in different months numbering from a minimum of 2 to a maximum of 6. The cyan squares show the case when the minimum number of calls in each of the 7 months is set to 5 and the maximum number is 8, in contrast to the maximum being 4 in  $\mathcal{S}$ . The orange down-triangles illustrate the case when pairs having the same most common locations are chosen. This curve is almost flat allowing for fluctuations.

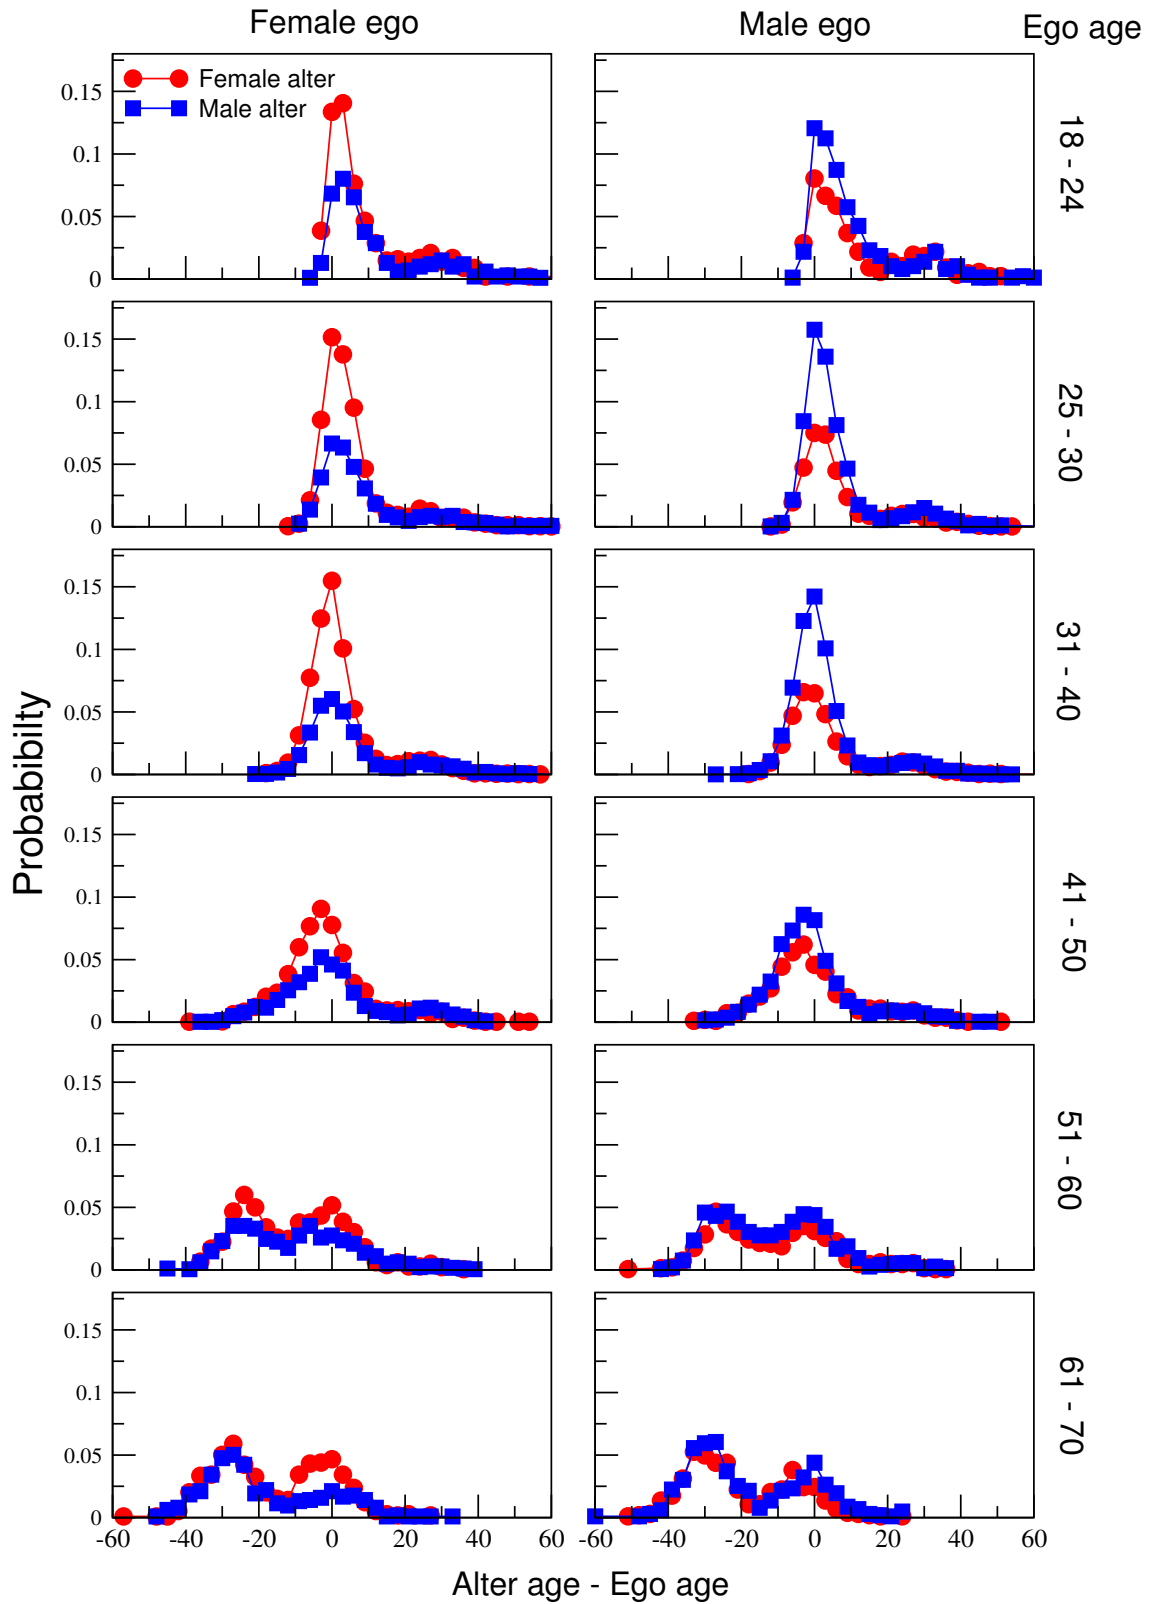

FIG. S4. **Gender of individuals in the chosen pairs.** Distribution of (alter age—ego age) for female and male egos in different age cohorts with alters belong to the set  $\mathcal{S}$ .

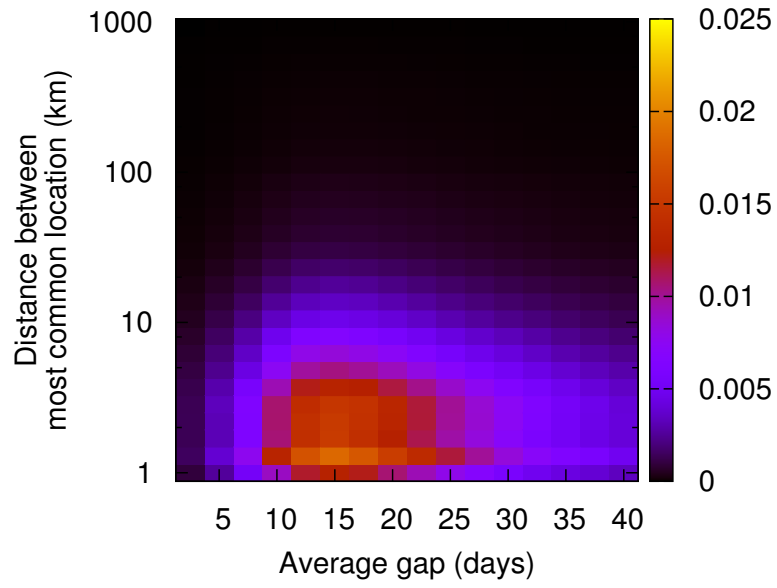

FIG. S5. **Distribution of inter-call gap and geographical separation of individuals making up pairs.** Joint probability density function of average gap between pairs ( $\langle\tau\rangle_{ij}$ ) and the distance between their most common location ( $d_{ij}$ ). Pairs are chosen irrespective of age and gender.

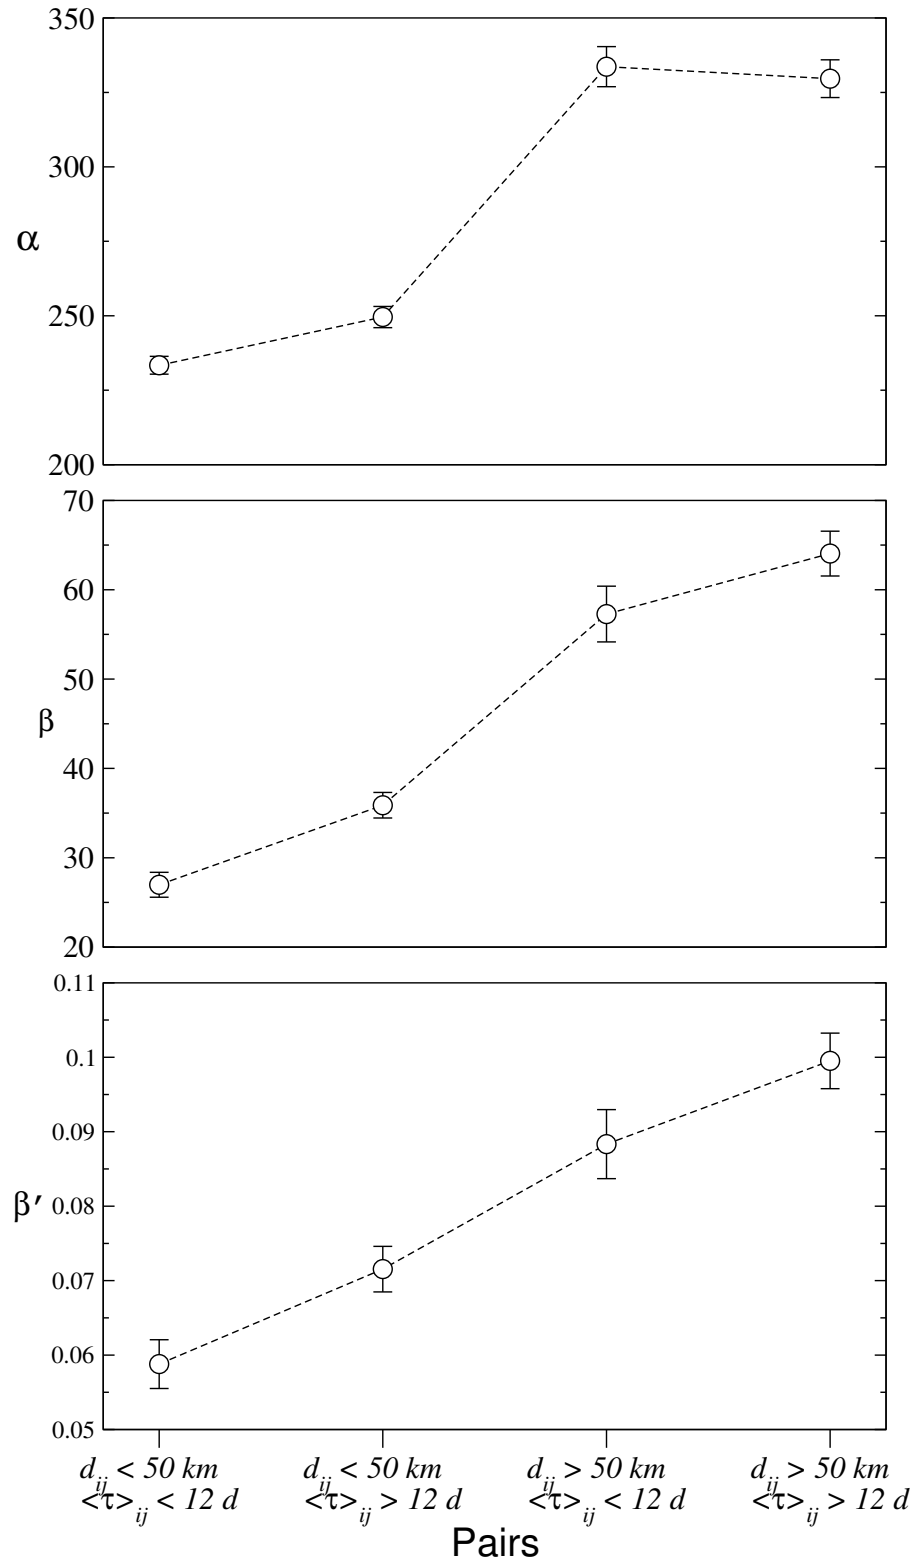

FIG. S6. **Regression coefficients irrespective of the gender of individuals in the pairs.** Coefficients  $\alpha$ ,  $\beta$  and  $\beta'$  corresponding four different categories based on distance between most common location ( $d_{ij}$ ) and average gap ( $\langle \tau \rangle_{ij}$ ). Pairs are chosen irrespective of age and gender. The dashed line is a guide to the eye. (Also see Fig. 5 in the main text).

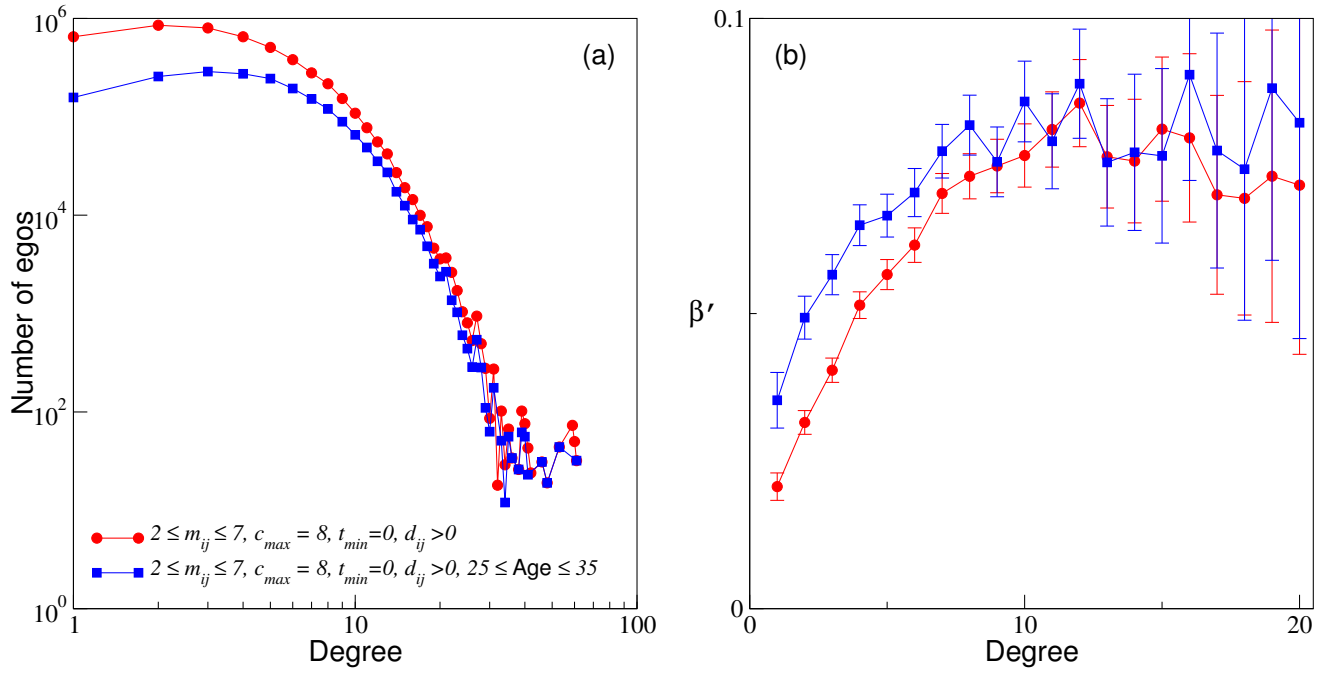

FIG. S7. **Dependence on degree.** (a) The distribution of degree of egos. (b) Coefficient  $\beta'$  as a function of degree ( $\beta'$  is the strength of the dependence of the duration of the succeeding call on the logarithm of the inter-call gap when the variables are scaled by their respective averages). The different symbols represent the criteria for choosing the sets of ego-alter pairs, and are indicated in the legend of (a). The egos in the set (represented by squares) were chosen such that their ages belonged to the range  $[25, 35]$ . We restrict our analysis to a maximum degree of 20. For the larger values of degree, the lesser number of samples weakens the statistical significance of the results.
